# Supplementary material for: Decreased Functional Connectivity of Brain Networks in the Alpha Band after Sleep Deprivation Is Associated with Decreased Inhibitory Control in Young Male Adults
Source: MDPI journal article supplement (doi:10.3390/ijerph20054663), 2023-03-06
Supplement: s1 [file s1]

**Table S1.** 101 pairs of brain regions with significant functional connectivity.

| Number | Brain region one  | Brain region two  |
|--------|-------------------|-------------------|
| 1      | Frontal_Sup_Orb_L | Frontal_Mid_R     |
| 2      | Frontal_Mid_R     | Frontal_Mid_Orb_L |
| 3      | Frontal_Mid_Orb_L | Frontal_Mid_Orb_R |
| 4      | Frontal_Sup_Orb_L | Frontal_Inf_Tri_R |
| 5      | Frontal_Mid_Orb_L | Frontal_Inf_Tri_R |
| 6      | Frontal_Mid_Orb_R | Frontal_Inf_Tri_R |
| 7      | Frontal_Sup_Orb_L | Frontal_Mid_Orb_L |
| 8      | Frontal_Mid_R     | Frontal_Mid_Orb_L |
| 9      | Frontal_Mid_Orb_L | Frontal_Mid_Orb_L |
| 10     | Frontal_Inf_Tri_R | Frontal_Mid_Orb_L |
| 11     | Frontal_Mid_R     | Frontal_Mid_Orb_R |
| 12     | Frontal_Mid_Orb_L | Frontal_Mid_Orb_R |
| 13     | Frontal_Inf_Tri_R | Frontal_Mid_Orb_R |
| 14     | Frontal_Mid_R     | Rectus_L          |
| 15     | Frontal_Inf_Tri_R | Rectus_L          |
| 16     | Cingulum_Post_L   | ParaHippocampal_L |
| 17     | Olfactory_L       | Calcarine_L       |
| 18     | Rectus_L          | Calcarine_L       |
| 19     | Cingulum_Post_L   | Calcarine_L       |
| 20     | Cingulum_Post_R   | Calcarine_L       |
| 21     | Cingulum_Post_L   | Calcarine_R       |
| 22     | Cingulum_Post_R   | Calcarine_R       |
| 23     | Hippocampus_R     | Calcarine_R       |
| 24     | Calcarine_L       | Calcarine_R       |
| 25     | ParaHippocampal_L | Cuneus_L          |
| 26     | Calcarine_L       | Cuneus_L          |
| 27     | Calcarine_R       | Cuneus_L          |
| 28     | Calcarine_R       | Cuneus_R          |
| 29     | Cingulum_Post_L   | Lingual_L         |
| 30     | Cingulum_Post_R   | Lingual_L         |
| 31     | Calcarine_L       | Lingual_L         |
| 32     | Calcarine_R       | Lingual_L         |
| 33     | Cuneus_L          | Lingual_L         |
| 34     | Cuneus_R          | Lingual_L         |
| 35     | Cingulum_Mid_L    | Lingual_R         |
| 36     | Cingulum_Post_L   | Lingual_R         |
| 37     | Cingulum_Post_R   | Lingual_R         |
| 38     | Cuneus_L          | Lingual_R         |
| 39     | Calcarine_L       | Occipital_Sup_L   |
| 40     | Precentral_L      | Occipital_Mid_L   |
| 41     | Cingulum_Post_L   | Occipital_Mid_L   |

|    |                   |                      |
|----|-------------------|----------------------|
| 42 | Calcarine_L       | Occipital_Mid_L      |
| 43 | Cuneus_L          | Occipital_Mid_L      |
| 44 | Lingual_L         | Occipital_Mid_L      |
| 45 | Lingual_L         | Occipital_Mid_R      |
| 46 | Cingulum_Mid_L    | Occipital_Inf_L      |
| 47 | Cingulum_Post_L   | Occipital_Inf_L      |
| 48 | Cingulum_Post_R   | Occipital_Inf_L      |
| 49 | Cuneus_L          | Occipital_Inf_L      |
| 50 | Occipital_Sup_L   | Occipital_Inf_L      |
| 51 | Occipital_Mid_L   | Occipital_Inf_L      |
| 52 | Olfactory_L       | Occipital_Inf_R      |
| 53 | Cingulum_Mid_L    | Occipital_Inf_R      |
| 54 | Cingulum_Post_L   | Occipital_Inf_R      |
| 55 | Cingulum_Post_R   | Occipital_Inf_R      |
| 56 | Cuneus_L          | Occipital_Inf_R      |
| 57 | Occipital_Sup_L   | Occipital_Inf_R      |
| 58 | Occipital_Mid_L   | Occipital_Inf_R      |
| 59 | Occipital_Inf_L   | Occipital_Inf_R      |
| 60 | Cingulum_Post_L   | Fusiform_L           |
| 61 | Cuneus_L          | Fusiform_L           |
| 62 | Cingulum_Post_L   | Fusiform_R           |
| 63 | Cingulum_Post_R   | Fusiform_R           |
| 64 | Cuneus_L          | Fusiform_R           |
| 65 | Calcarine_L       | Postcentral_L        |
| 66 | Lingual_L         | Postcentral_L        |
| 67 | Occipital_Mid_L   | Postcentral_L        |
| 68 | Occipital_Inf_L   | Postcentral_L        |
| 69 | Occipital_Inf_R   | Postcentral_L        |
| 70 | Cingulum_Post_L   | Postcentral_R        |
| 71 | Occipital_Inf_R   | Parietal_Inf_L       |
| 72 | Frontal_Mid_Orb_R | Parietal_Inf_R       |
| 73 | Frontal_Mid_Orb_R | Parietal_Inf_R       |
| 74 | Calcarine_L       | Precuneus_L          |
| 75 | Lingual_L         | Precuneus_L          |
| 76 | Occipital_Inf_L   | Precuneus_L          |
| 77 | Occipital_Inf_R   | Precuneus_L          |
| 78 | Postcentral_L     | Paracentral_Lobule_L |
| 79 | Precentral_L      | Paracentral_Lobule_R |
| 80 | Postcentral_L     | Paracentral_Lobule_R |
| 81 | Lingual_R         | Temporal_Sup_R       |
| 82 | Occipital_Inf_R   | Temporal_Sup_R       |
| 83 | Fusiform_R        | Temporal_Sup_R       |
| 84 | Olfactory_L       | Temporal_Mid_L       |
| 85 | Cingulum_Post_L   | Temporal_Mid_L       |

|     |                 |                |
|-----|-----------------|----------------|
| 86  | Calcarine_L     | Temporal_Mid_L |
| 87  | Cuneus_L        | Temporal_Mid_L |
| 88  | Calcarine_L     | Temporal_Mid_R |
| 89  | Lingual_L       | Temporal_Mid_R |
| 90  | Lingual_R       | Temporal_Mid_R |
| 91  | Occipital_Inf_R | Temporal_Mid_R |
| 92  | Fusiform_R      | Temporal_Mid_R |
| 93  | Parietal_Inf_R  | Temporal_Mid_R |
| 94  | Temporal_Mid_R  | Temporal_Inf_L |
| 95  | Rectus_L        | Temporal_Inf_R |
| 96  | Rectus_R        | Temporal_Inf_R |
| 97  | Cingulum_Post_L | Temporal_Inf_R |
| 98  | Calcarine_L     | Temporal_Inf_R |
| 99  | Occipital_Inf_R | Temporal_Inf_R |
| 100 | Temporal_Sup_R  | Temporal_Inf_R |
| 101 | Temporal_Mid_R  | Temporal_Inf_R |

---
